# Supplementary material
Source: PubMed Central journal article supplement (PMC3915739)
Supplement: NIHMS538372-supplement-supplement_1.pdf [file NIHMS538372-supplement-supplement_1.pdf]

Appendix Table 1. Ten most common indications for echocardiography in Ontario, 2001-2009.

| Diagnosis                                                                                                      | Code | 2001-2003 | 2004-2006 | 2007-2009 |
|----------------------------------------------------------------------------------------------------------------|------|-----------|-----------|-----------|
| Missing                                                                                                        | 999  | 75.5%     | 73.3%     | 71.3%     |
| Chest pain, tachycardia, syncope, shock, edema, masses                                                         | 785  | 4.8%      | 5.9%      | 7.0%      |
| All other forms of heart disease                                                                               | 429  | 4.9%      | 6.1%      | 6.5%      |
| Acute coronary insufficiency, angina pectoris, acute ischaemic heart disease                                   | 413  | 4.8%      | 4.5%      | 4.6%      |
| Old myocardial infarction, chronic coronary artery disease of arteriosclerotic heart disease, without symptoms | 412  | 2.6%      | 2.9%      | 3.6%      |
| Paroxysmal tachycardia, atrial or ventricular flutter or fibrillation, cardiac arrest, other arrhythmias       | 427  | 1.8%      | 1.9%      | 1.7%      |
| Essential, benign hypertension                                                                                 | 401  | 1.4%      | 1.7%      | 1.3%      |
| Mitral stenosis, mitral insufficiency                                                                          | 394  | 0.8%      | 0.6%      | 0.3%      |
| Congestive heart failure                                                                                       | 428  | 0.4%      | 0.5%      | 0.6%      |
| Hypertensive heart disease                                                                                     | 402  | 0.1%      | 0.3%      | 0.8%      |
